# Supplementary material for: Tentative Identification of the Second Substrate Binding Site in Arabidopsis Phytochelatin Synthase
Source: PubMed Central journal article supplement (PMC3855540; doi:10.1371/journal.pone.0082675), 2013-12-05

Coomassie blue

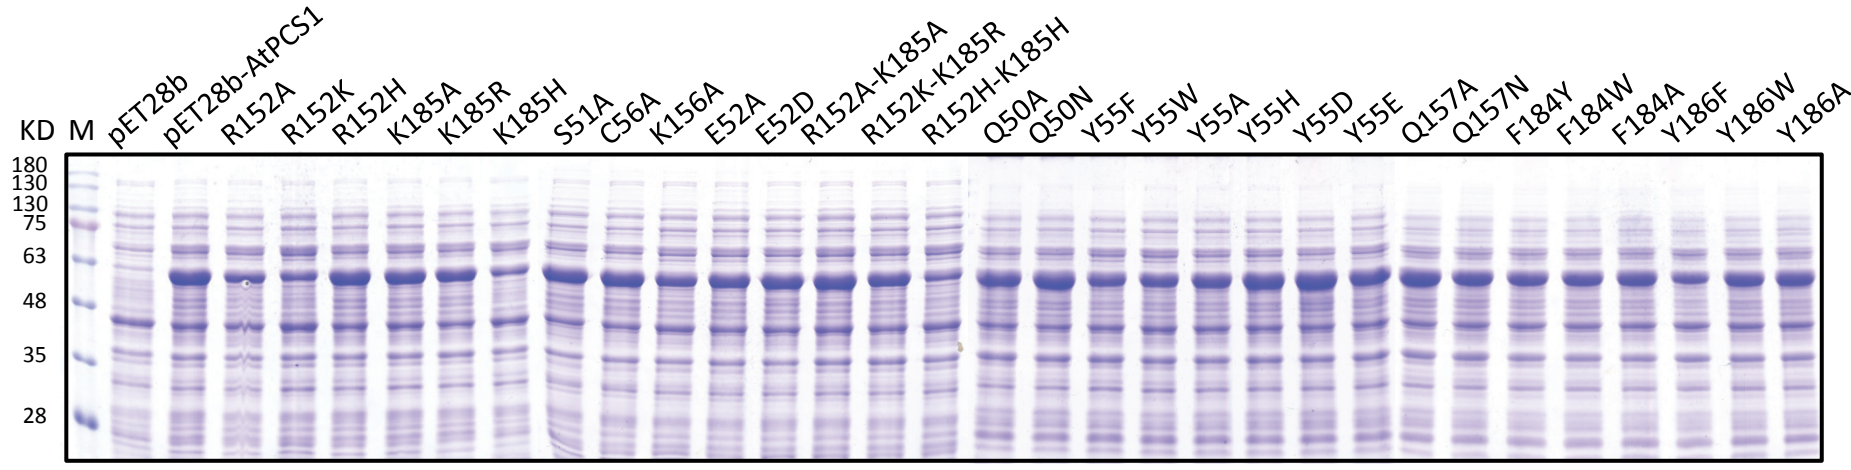

Anti-His tag

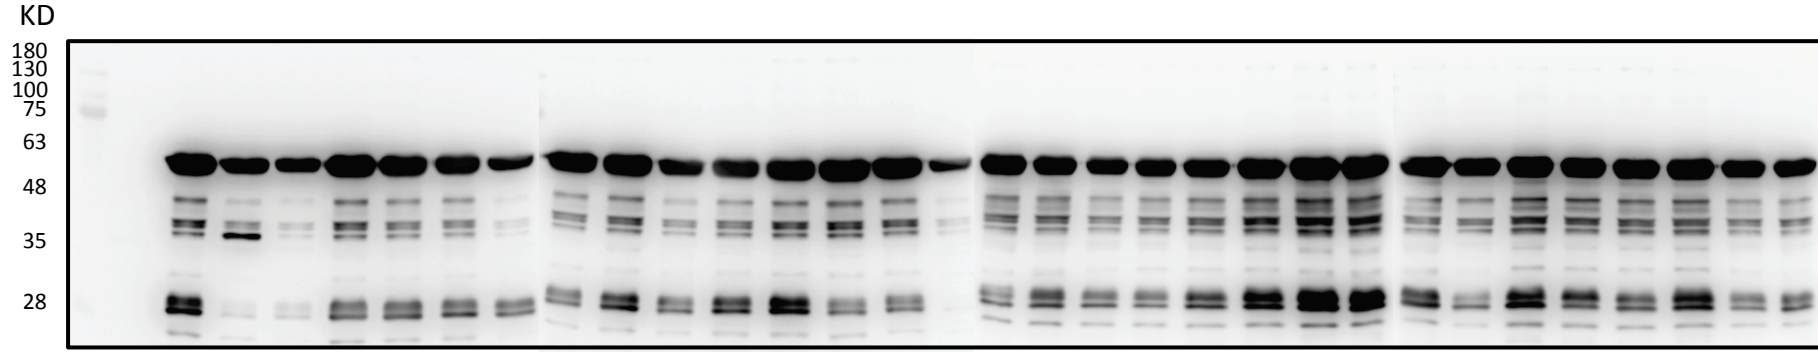

Purified AtPCS1

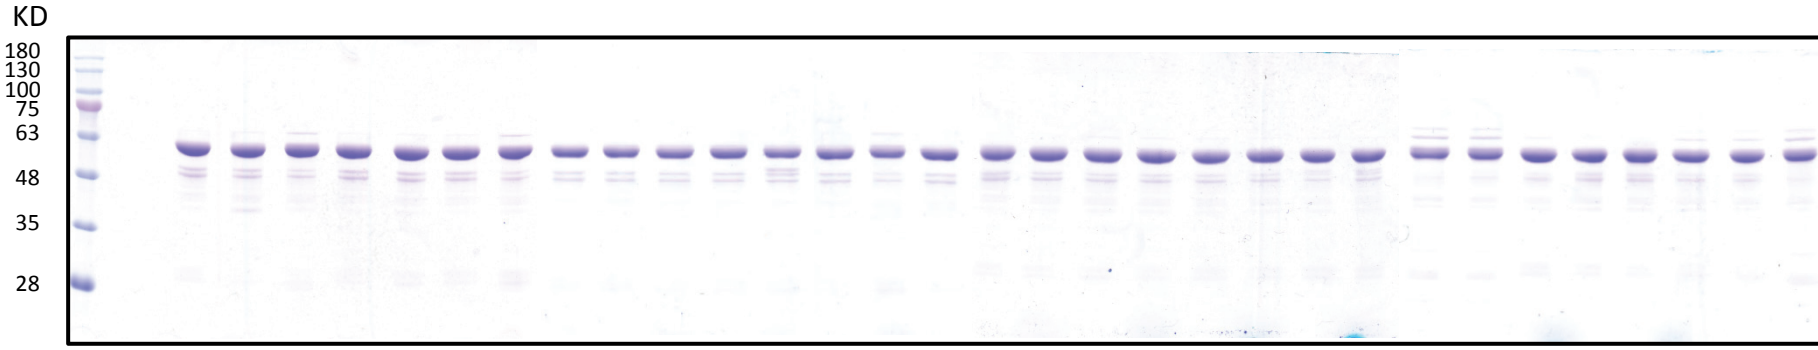

Supplement: pone.0082675.s001.pdf [file pone.0082675.s001.pdf]
